# Supplementary material
Source: publisher figshare collection journal article supplement (https://acs.figshare.com/ndownloader/files/10247055)
Supplement: Supplementary file 1 [file 10247055]

## Supporting information

### Accelerated stress-test of Pt/C nanoparticles in interface with an anion-exchange membrane – an identical-location transmission electron microscopy study

Clémence Lafforgue<sup>1</sup>, Marian Chatenet<sup>1-2,\*</sup>, Laetitia Dubau<sup>1</sup>, Dario R. Dekel<sup>3-4</sup>

<sup>1</sup> Univ. Grenoble Alpes, CNRS, Grenoble INP<sup>#</sup>, LEPMI, 38000 Grenoble, France

<sup>2</sup> Institut Universitaire de France (IUF), 1 rue Descartes, 75231 Paris Cedex 05, France

<sup>3</sup> The Wolfson Department of Chemical Engineering, Technion – Israel Institute of Technology, Haifa 3200003, Israel

<sup>4</sup> The Nancy & Stephan Grand Technion Energy Program (GTEP), Technion – Israel Institute of Technology, Haifa 3200003, Israel

<sup>#</sup> Institute of Engineering Univ. Grenoble Alpes

\* Corresponding author: [Marian.Chatenet@grenoble-inp.fr](mailto:Marian.Chatenet@grenoble-inp.fr)

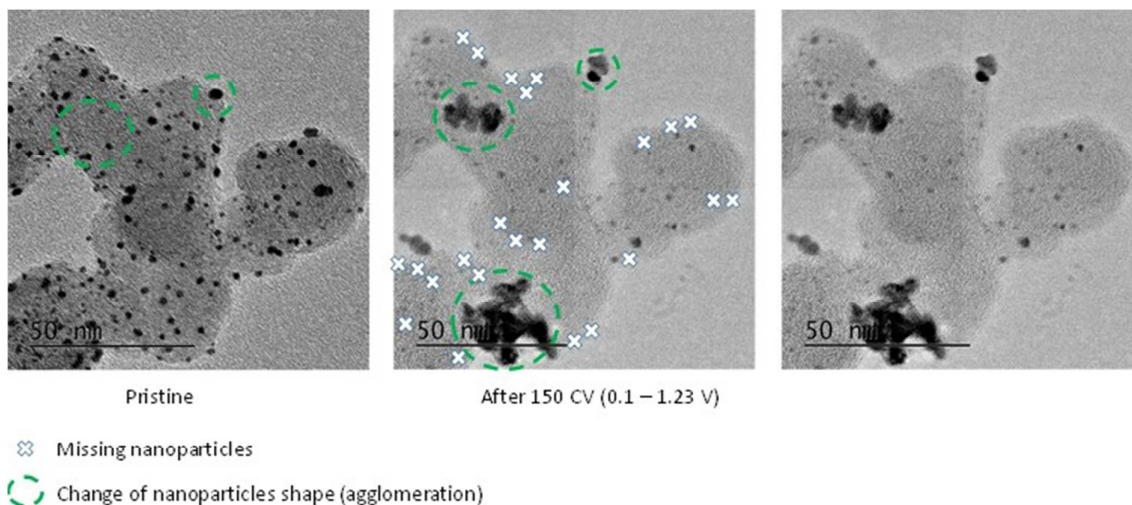

Figure S1: Representative ILTEM micrographs of Pt/C nanoparticles before (Pristine) and after 150 CV cycles performed at  $v = 100 \text{ mV s}^{-1}$  between 0.1 and 1.23 V vs. RHE in 0.1 M NaOH at  $T = 25^\circ\text{C}$ . The markers are not comprehensive and just illustrate the main degradation mechanisms at stake during the potential cycling procedure.

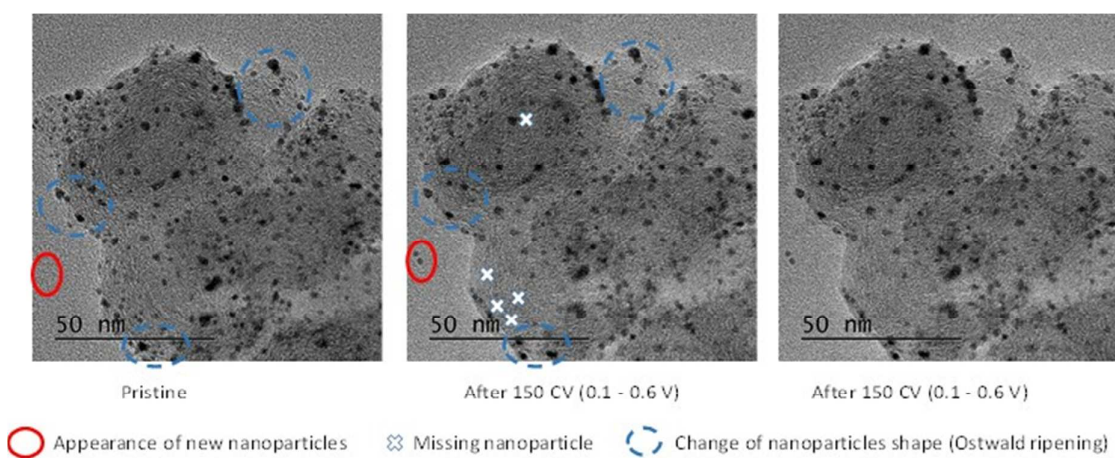

Figure S2: Representative ILTEM micrographs of Pt/C nanoparticles before (Pristine) and after 150 CV cycles performed at  $v = 100 \text{ mV s}^{-1}$  between 0.1 and 0.6 V vs. RHE in 0.1 M NaOH at  $T = 25^\circ\text{C}$ . The markers are not comprehensive and just illustrate the main degradation mechanisms at stake during the potential cycling procedure.

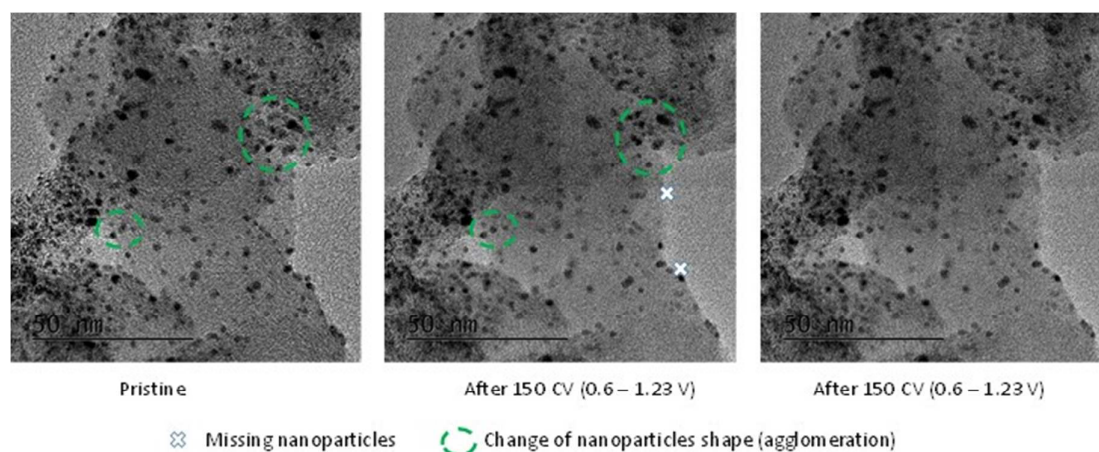

Figure S3: Representative ILTEM micrographs of Pt/C nanoparticles before (Pristine) and after 150 CV cycles performed at  $v = 100 \text{ mV s}^{-1}$  between 0.6 and 1.23 V vs. RHE in 0.1 M NaOH at  $T = 25^\circ\text{C}$ . The markers are not comprehensive and just illustrate the main degradation mechanisms at stake during the potential cycling procedure.

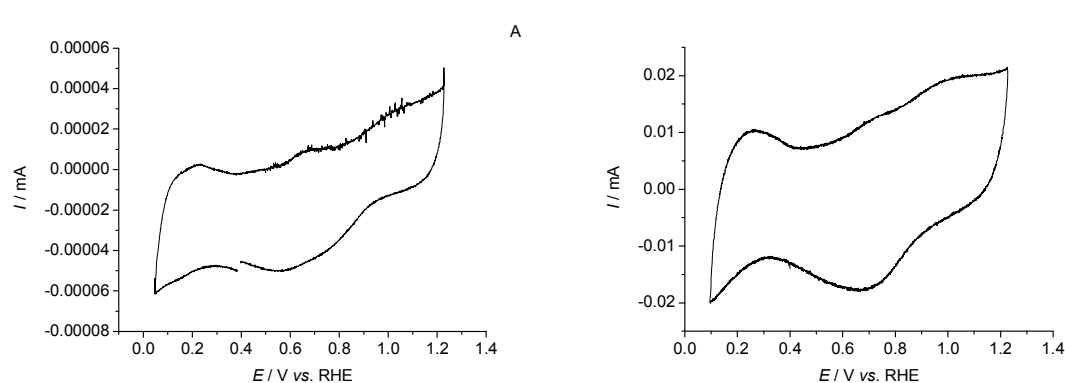

Figure S4: (A) typical electrochemical response of an ultra-microelectrode with cavity filled with 10 wt% Pt/C electrocatalyst in interface with an anion-exchange membrane. The measurement was performed in the dry cell under inert atmosphere at  $v = 20 \text{ mV s}^{-1}$ . (B) Example of a representative cycle (here the 150<sup>th</sup>) of the accelerated stress test performed on the gold TEM grid supporting the 10wt% Pt/C electrocatalyst for the ILTEM experiments. The measurement was performed in the dry cell under inert atmosphere at  $v = 100 \text{ mV s}^{-1}$ .

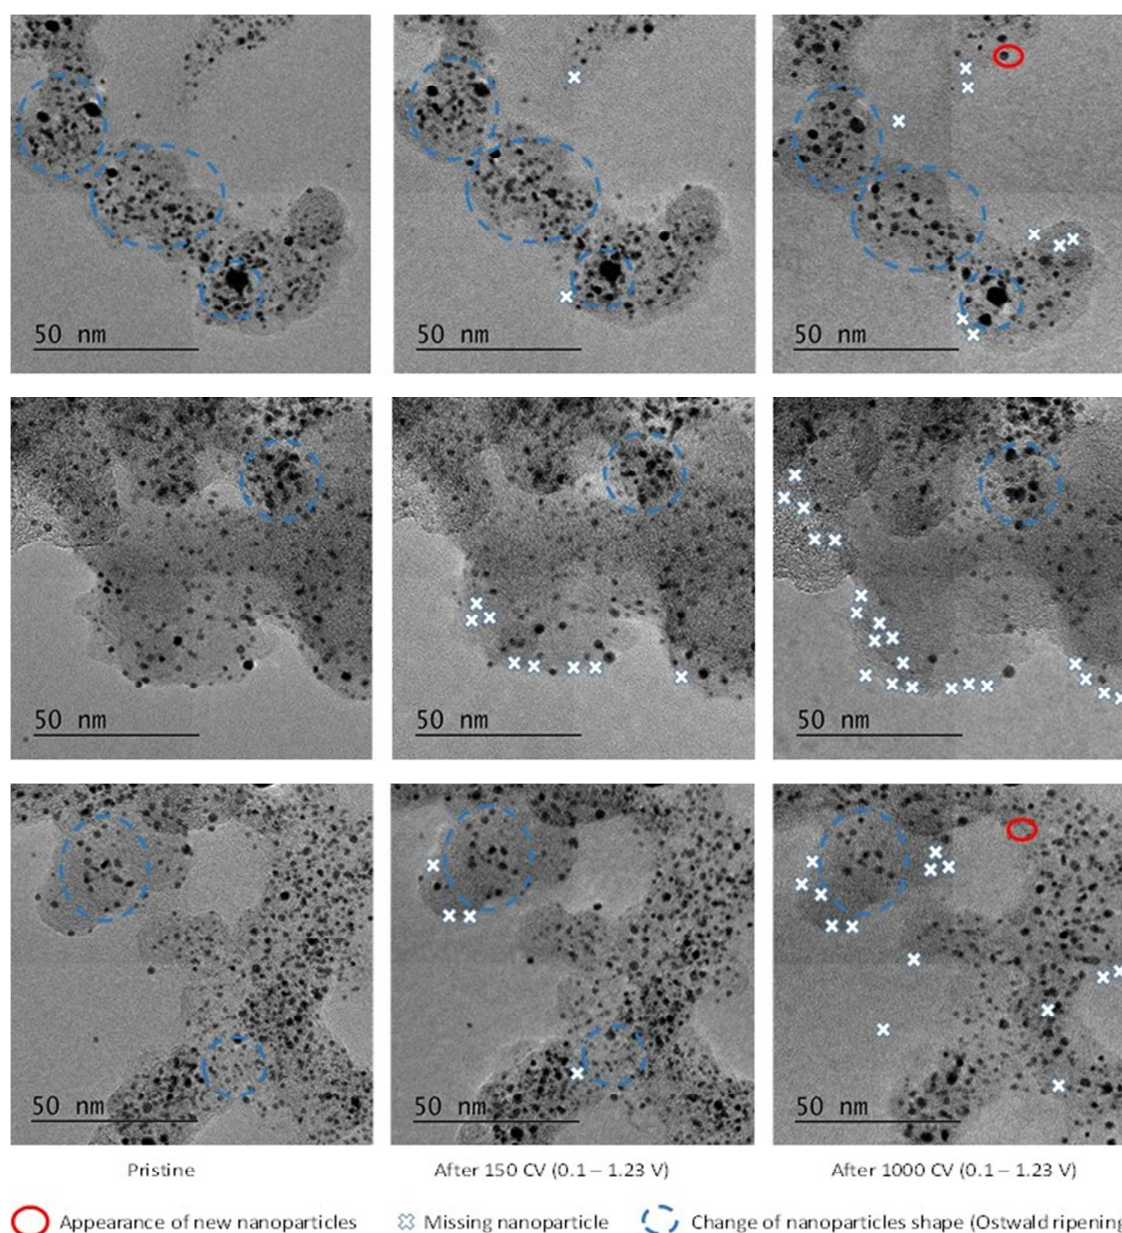

Figure S5: Representative ILTEM micrographs of Pt/C nanoparticles before (Pristine) and after 150 or 1000 CV cycles performed at  $v = 100 \text{ mV s}^{-1}$  between 0.1 and 1.23 V vs. RHE in interface with an anion exchange membrane at  $T = 25^\circ\text{C}$ . The markers are not comprehensive and just illustrate the main degradation mechanisms at stake during the potential cycling procedure.

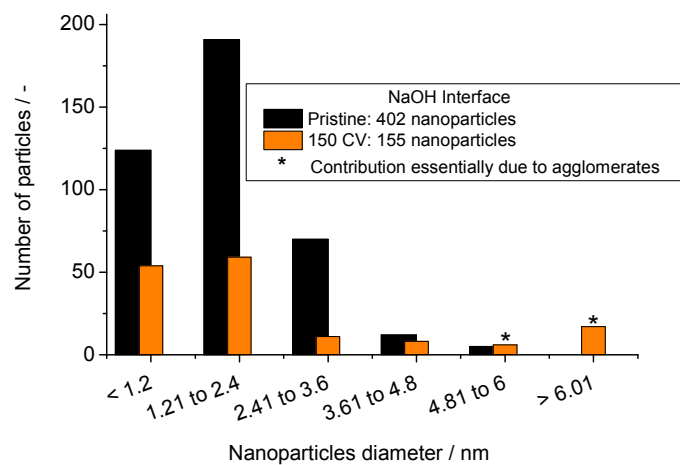

Figure S6: Particle size distribution histograms constructed by counting isolated and agglomerated nanoparticles from representative ITEM micrographs of Pt/C before (Pristine) and after (A) 150 CV cycles performed in 0.1 M NaOH, the potential being varied at  $v = 100 \text{ mV s}^{-1}$  between 0.1 and 1.23 V vs. RHE and the cell temperature being  $T = 25^\circ\text{C}$ .
